# Supplementary material
Source: publisher figshare collection journal article supplement (https://karger.figshare.com/ndownloader/files/12419888)
Supplement: Supplementary file 1 [file 12419888]

## Supplementary material

**Supplementary Table S1** - Primer sequences and details of the cycling conditions and annealing temperatures

| Gene                                                                                      | Forward primer (5' to 3') | Reverse primer (5' to 3') | Cycling conditions                           | Melting temperature (T <sub>m</sub> ) |
|-------------------------------------------------------------------------------------------|---------------------------|---------------------------|----------------------------------------------|---------------------------------------|
| <i>VDR</i> <sup>1</sup><br>Vitamin D receptor<br>[1-3]                                    | AGATGACCCTTCTGTGACCC      | AGCTTCTTCAGTCCCACCTG      | 95°C for 15s<br>60°C for 15s<br>72°C for 20s | Forward: 59°C<br>Reverse: 59°C        |
| <i>CEBPA</i> <sup>2</sup><br>CCAAT/enhancer binding protein, alpha<br>[2-3]               | AGCCTTGTTTGTACTGTATG      | AAAATGGTGGTTTAGCAGAG      | 95°C for 15s<br>60°C for 15s<br>72°C for 20s | Forward: 54.3°C<br>Reverse: 58.3°C    |
| <i>CEBPB</i> <sup>2</sup><br>CCAAT/enhancer binding protein, beta<br>[2-3]                | ATAAACTCTCTGCTTCTCCC      | CCGTAGGAACATCTTTAAGC      | 95°C for 15s<br>60°C for 15s<br>72°C for 20s | Forward: 56.6°C<br>Reverse: 57.9°C    |
| <i>CEBPD</i> <sup>2</sup><br>CCAAT/enhancer binding protein, delta<br>[2]                 | CAGACTTTTCAGACAAACCC      | TTTCGATTTCAAATGCTGC       | 95°C for 15s<br>60°C for 15s<br>72°C for 20s | Forward: 58.8°C<br>Reverse: 61.4°C    |
| <i>PPARG</i> <sup>1</sup><br>Peroxisome proliferator-activated receptor<br>gamma<br>[1-3] | CGACCAAGTAACTCTCCTCA      | GTTCCGTGACAATCTGTCTG      | 95°C for 15s<br>60°C for 15s<br>72°C for 20s | Forward: 55°C<br>Reverse: 57°C        |
| <i>CAPN1</i> <sup>2</sup><br>Calpain 1, large subunit<br>[4-5]                            | AGACCATGTTCCGATTTTTC      | TGCAACCACTTAAACAAGTC      | 95°C for 15s<br>60°C for 15s<br>72°C for 20s | Forward: 60.4°C<br>Reverse: 57.8°C    |
| <i>BCL2</i> <sup>2</sup><br>B-cell CLL/lymphoma 2<br>[6]                                  | GATTGTGGCCTTCTTTGAG       | GTTCCACAAAGGCATCC         | 95°C for 15s<br>60°C for 15s<br>72°C for 20s | Forward: 59.8°C<br>Reverse: 59°C      |
| <i>CASP3</i> <sup>3</sup>                                                                 | GTGCTACAATGCCCCTGGAT      | GCCCATTCAATTATTGCTTTCC    | 95°C for 15s                                 | Forward: 59.3°C                       |

|                                                          |                        |                           |                              |                 |
|----------------------------------------------------------|------------------------|---------------------------|------------------------------|-----------------|
| Caspase 3, apoptosis-related cysteine peptidase<br>[5-7] |                        |                           | 60°C for 15s<br>72°C for 20s | Reverse: 54.2°C |
| <i>CASP9</i> <sup>2</sup>                                | CTCTACTTTCCAGGTTT      | TTTCACCGAAACAGCATT        | 95°C for 15s                 | Forward: 60.4°C |
| Caspase 9, apoptosis-related cysteine peptidase<br>[7]   |                        |                           | 60°C for 15s<br>72°C for 20s | Reverse: 57.8°C |
| <i>CDKN1A</i> <sup>2</sup>                               | CAGCATGACAGATTTCTACC   | CAGGGTATGTACATGAGGAG      | 95°C for 15s                 | Forward: 57.3°C |
| Cyclin-dependent kinase inhibitor 1A<br>[8-9]            |                        |                           | 60°C for 15s<br>72°C for 20s | Reverse: 57°C   |
| <i>RPL13A</i> <sup>4</sup>                               | CCTGGAGGAGAAGAGGAAAGGA | TTGAGGACCTCTGTGTATTTGTCAA | 95°C for 15s                 | Forward: 62°C   |
| Ribosomal protein L13a<br>[1]                            |                        |                           | 60°C for 15s<br>72°C for 20s | Reverse: 63°C   |

<sup>1</sup> Lahnalampi M, Heinäniemi M, Sinkkonen L, Wabitsch M, Carlberg C: Time-resolved expression profiling of the nuclear receptor superfamily in human adipogenesis. PLoS One 2010; 5(9): e12991.

<sup>2</sup> KiCqStart™ SYBR® Green Primers, Sigma-Aldrich Co. LLC, USA.

<sup>3</sup> Aquino I, Tsuboy MS, Marcarini JC, Mantovani MS, Perazzo FF, Maistro EL: Genotoxic evaluation of the antimalarial drugs artemisinin and artesunate in human HepG2 cells and effects on CASP3 and SOD1 gene expressions. Genetics and molecular research: GMR. 2013; 12: 2517-2527.

<sup>4</sup> Brandimarto, Jeffrey Alan: Molecular regulation of insulin-like growth factor binding protein-5 by signaling molecules downstream of the IGF-I receptor in mammary epithelial cells. Retrieved from <http://dx.doi.org/doi:10.7282/T32J6C4V>

## REFERENCES

[1] Lahnalampi M, Heinäniemi M, Sinkkonen L, Wabitsch M, Carlberg C: Time-resolved expression profiling of the nuclear receptor superfamily in human adipogenesis. PLoS One 2010; 5(9): e12991.

[2] Wood RJ: Vitamin D and adipogenesis: new molecular insights. Nutr Rev. 2008; 66:40-46.

[3] Nimitphong H, Holick MF, Fried SK, Lee MJ: 25-hydroxyvitamin D<sub>3</sub> and 1,25-dihydroxyvitamin D<sub>3</sub> promote the differentiation of human subcutaneous preadipocytes. PLoS One. 2012; 7:e52171

[4] Sergeev IN: 1,25-Dihydroxyvitamin D<sub>3</sub> induces Ca<sup>2+</sup>-mediated apoptosis in adipocytes via activation of calpain and caspase-12. Biochem Biophys Res Commun. 2009; 384: 18-21.

[5] Sergeev IN: Vitamin D-mediated apoptosis in cancer and obesity. Horm Mol Biol Clin Invest. 2014; 20: 43-49.

- [6] Nagel SA, Keuper M, Zagotta I, Enlund E, Ruperez AI, Debatin KM, Wabitsch M, Fischer-Posovszky P: Up-regulation of Bcl-2 during adipogenesis mediates apoptosis resistance in human adipocytes. *Mol Cell Endocrinol*. 2014; 382: 368-76.
- [7] Yoon S, Park SJ, Han JH, Kang JH, Kim JH, Lee J, Park S, Shin HJ, Kim K, Yun M, Chwae YJ: Caspase-dependent cell death-associated release of nucleosome and damage-associated molecular patterns. *Cell Death Dis*. 2014; 5: e1494.
- [8] Saramäki A, Diermeier S, Kellner R, Laitinen H, Väisänen S, Carlberg C: Cyclical chromatin looping and transcription factor association on the regulatory regions of the p21 (CDKN1A) gene in response to 1alpha,25-dihydroxyvitamin D3. *J Biol Chem*. 2009; 284: 8073-82.
- [9] Rodríguez-Acebes S, Palacios N, Botella-Carretero JJ, Olea N, Crespo L, Peromingo R, Gómez-Coronado D, Lasunción MA, Vázquez C, Martínez-Botas J: Gene expression profiling of subcutaneous adipose tissue in morbid obesity using a focused microarray: Distinct expression of cell-cycle- and differentiation-related genes. *BMC Med Genomics*. 2010; 3:61.

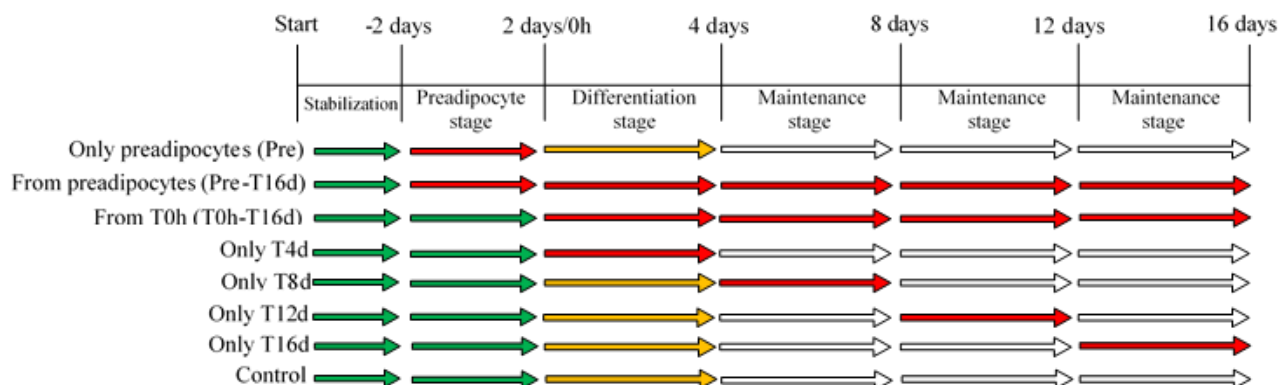

**Supplementary Figure S1** - RTCA study design. The arrows indicate the treatment/stabilization stage. Green: only the growth medium; yellow: only the differentiation medium; white: only the maintenance medium; and red: 1,25(OH)<sub>2</sub>D<sub>3</sub> treatment (10 nM and 100 nM), with the respective medium for the stage.

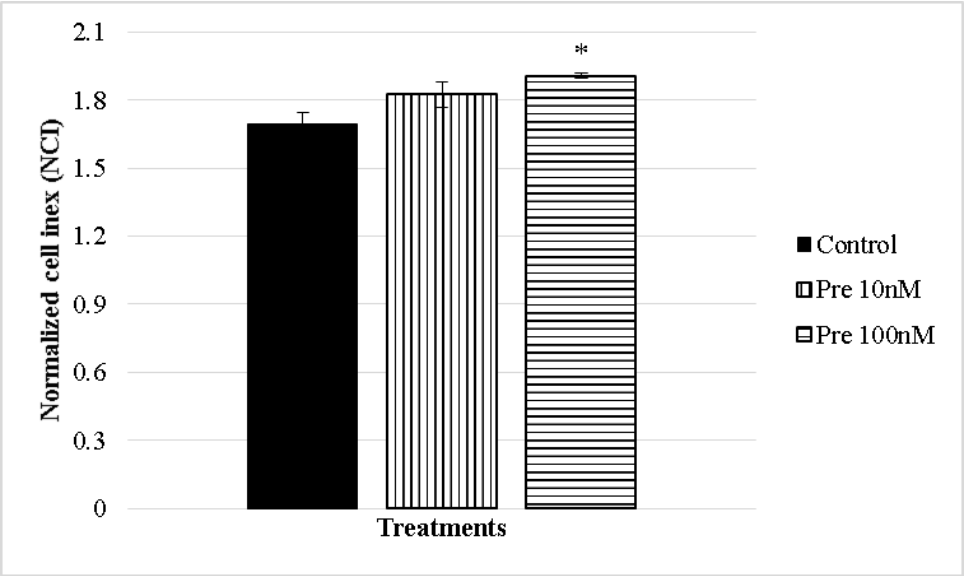

A

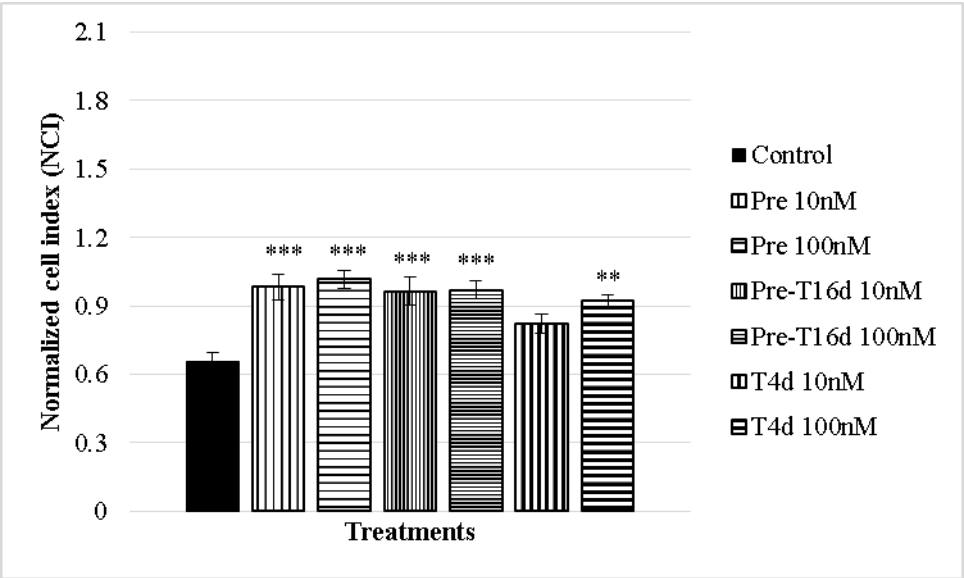

B

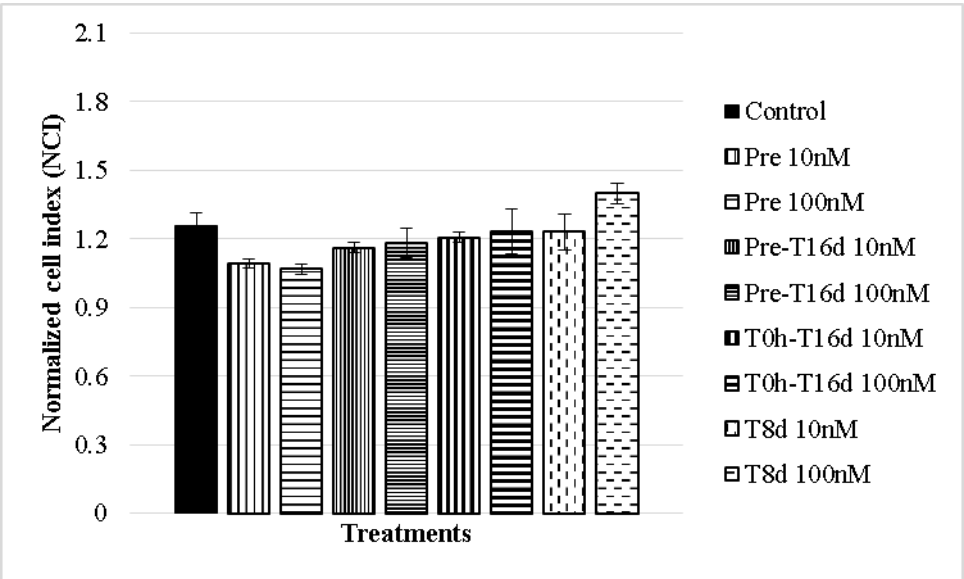

C

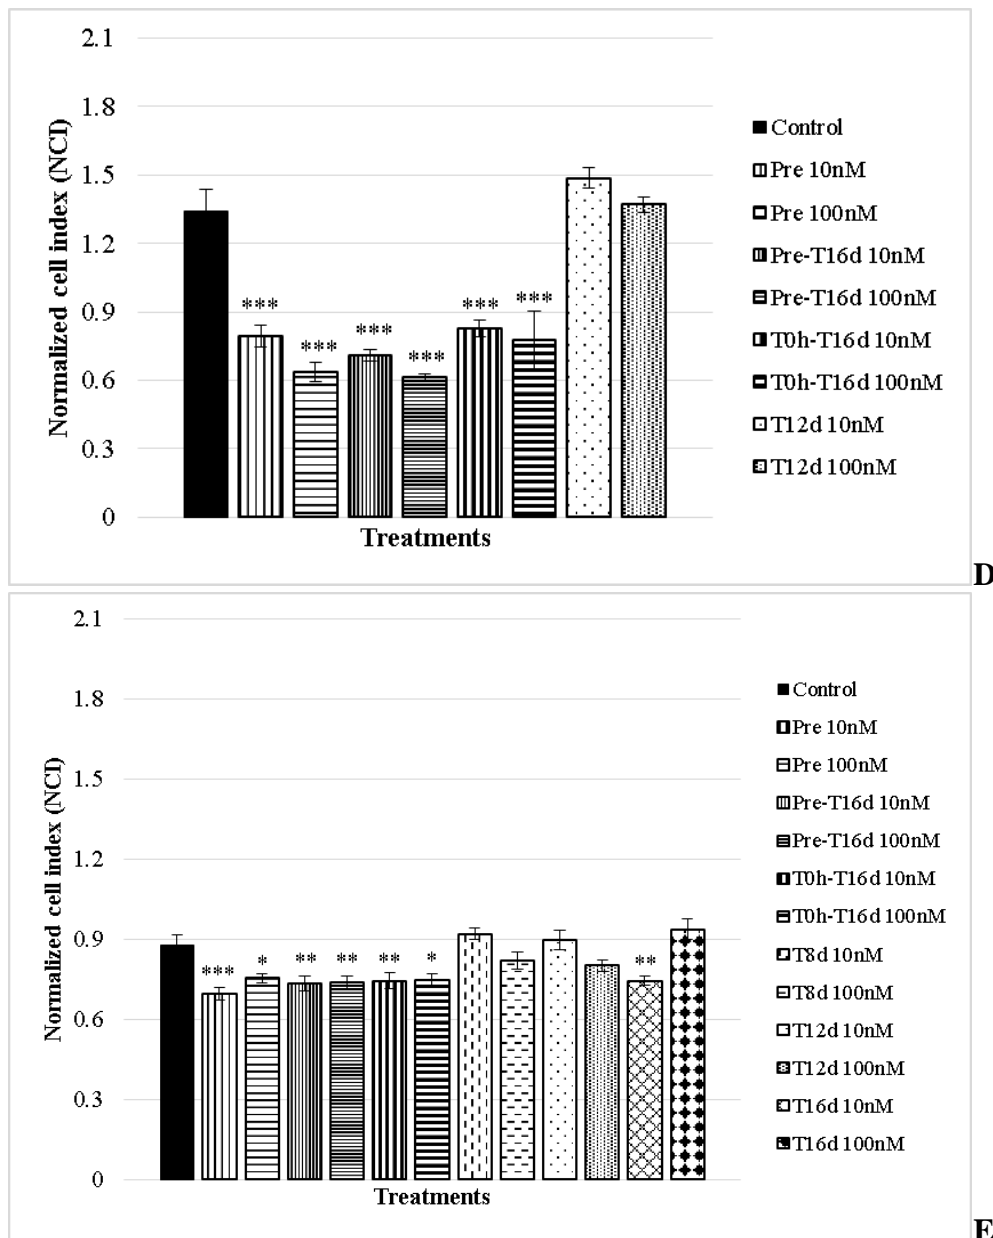

**Supplementary Figure S2 - Real-time cell analysis (RTCA) of (A) human preadipocytes and adipocytes treated with 1,25(OH)<sub>2</sub>D<sub>3</sub> for (B) 4, (C) 8, (D) 12, and (E) 16 days after differentiation. The data are presented as the mean  $\pm$  SEM. ANOVA was used to test significant differences between the treatments, and Dunnett's test was used to compare results with those of the control treatment. \* $p$  < 0.05, \*\* $p$  < 0.01, and \*\*\* $p$  < 0.001. Control: untreated cells; Pre: cells treated only during the preadipocyte stage; Pre-T16d: cells treated continuously from the preadipocyte stage; T0h-T16d: cells treated continuously from the differentiation stage (T0h); T4d: cells treated only 4 days after differentiation; T8d: cells treated only 8 days after differentiation; T12d: cells treated only 12 days after differentiation. All cells were differentiated at the same time, and differentiation proceeded equally among treatments for 16 days.**

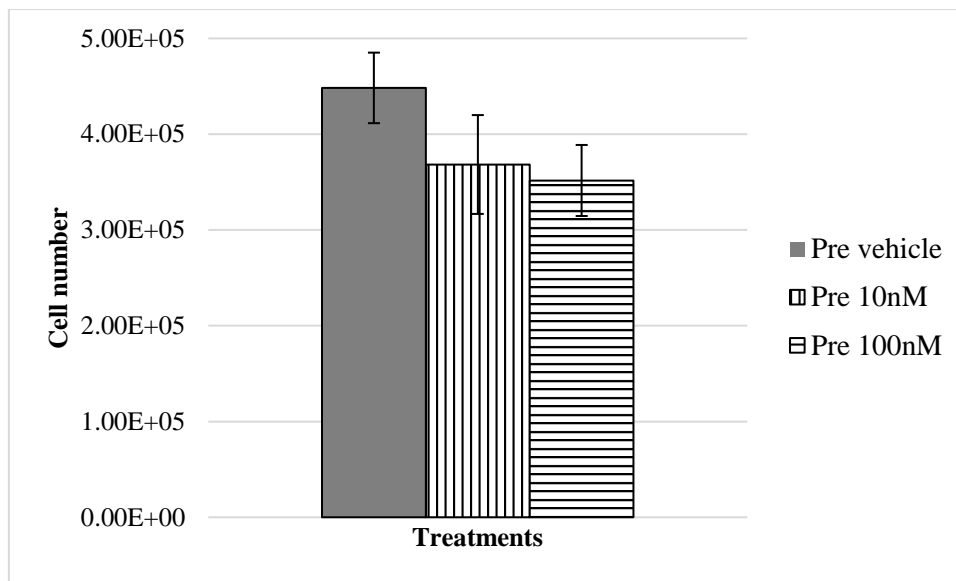

**Supplementary Figure S3** - Proliferation assay in human preadipocytes treated for 48 h with 1,25(OH)<sub>2</sub>D<sub>3</sub>. ANOVA was used to test significant differences between treatments, and Dunnett's test was used to compare results with those of the vehicle treatment. The data are presented as the mean ± SEM.

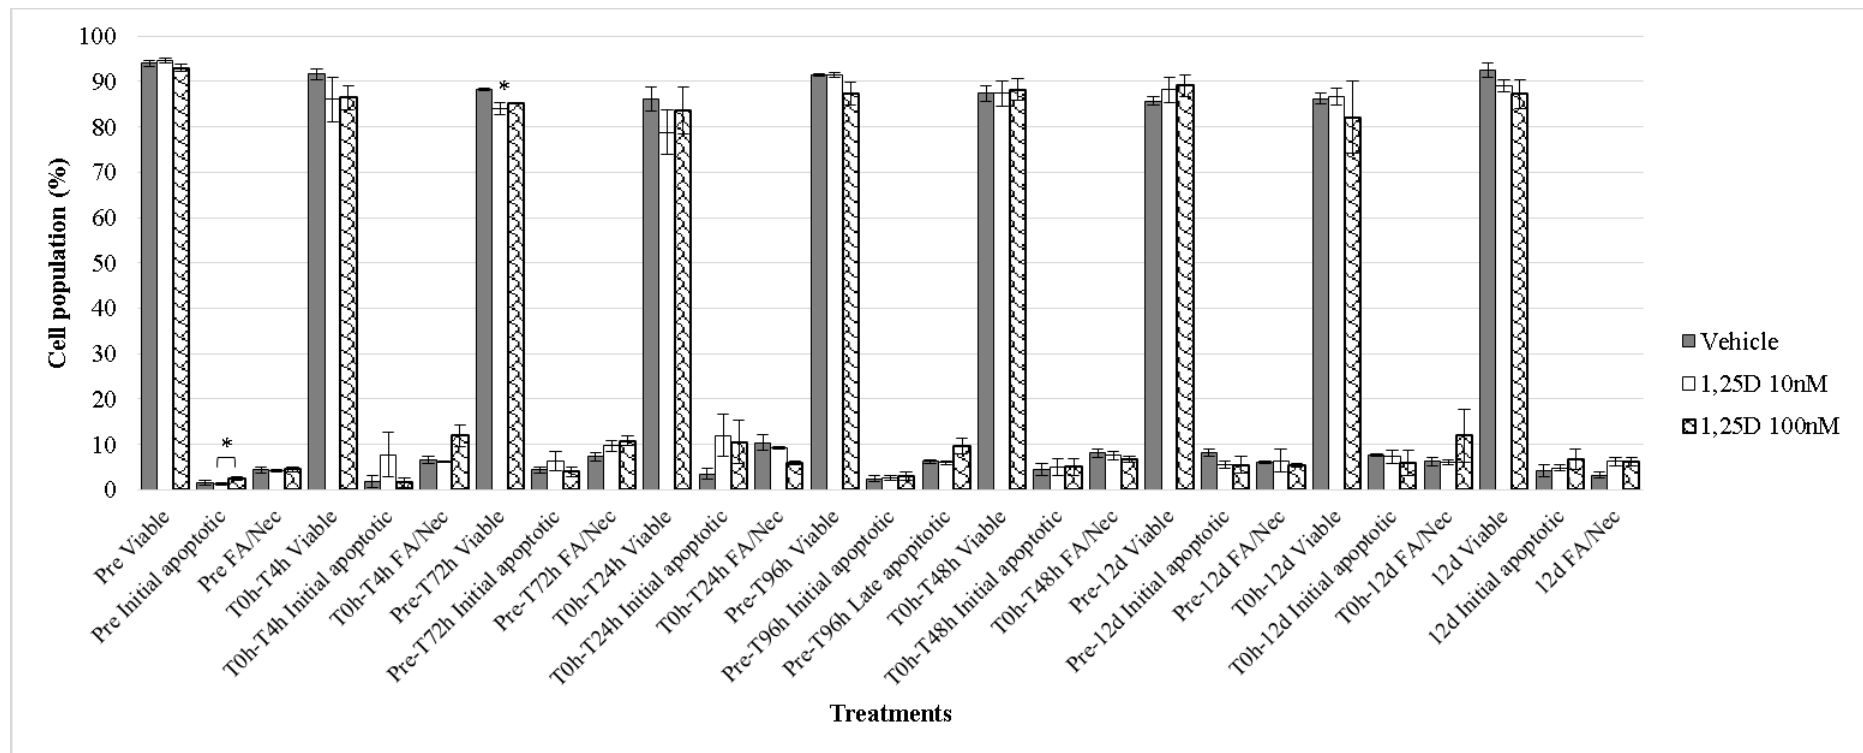

**Supplementary Figure S4** - Flow cytometry analysis (cell apoptosis analysis). The data are presented as the mean  $\pm$  SEM. ANOVA was used to test significant differences between the treatments, and Dunnett's test was used to compare results with those of the vehicle treatment. Student's  $t$ -test was used to test significant differences between the 1,25(OH) $_2$ D $_3$  (10 nM and 100 nM) treatments. \* $p < 0.05$ . FA: Final apoptotic; Nec: Necrotic; 1,25D: 1,25(OH) $_2$ D $_3$ .

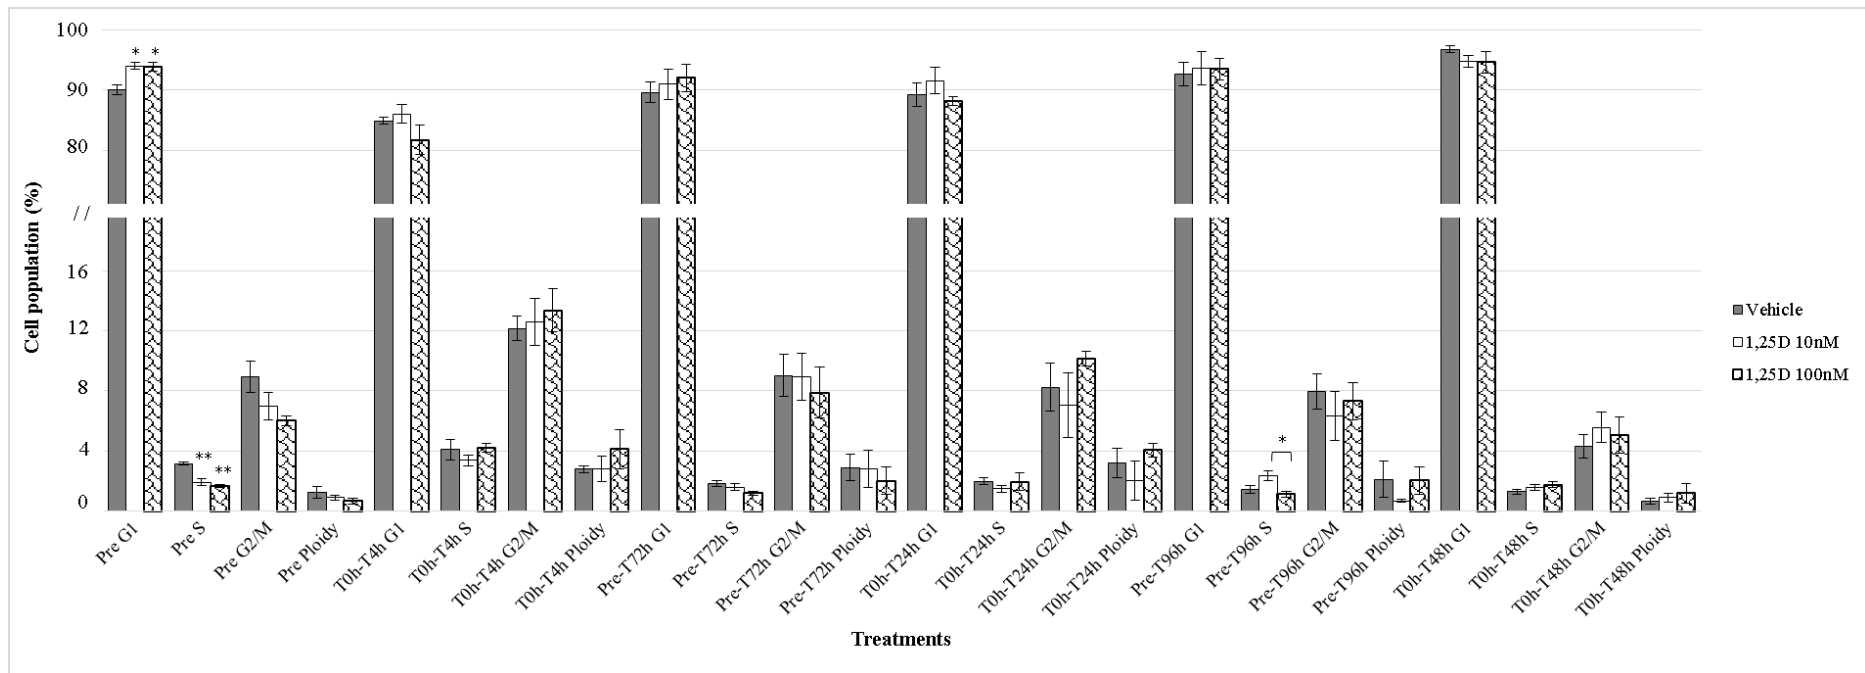

**Supplementary Figure S5** - Flow cytometry analysis results (cell cycle analysis). The data are presented as the mean  $\pm$  SEM. ANOVA was used to test significant differences between the treatments, and Dunnett's test was used to compare results with those of the vehicle treatment. Student's *t*-test was used to test significant differences between the 1,25(OH)<sub>2</sub>D<sub>3</sub> (10 nM and 100 nM) treatments. \**p* < 0.05 and \*\**p* < 0.01. 1,25D: 1,25(OH)<sub>2</sub>D<sub>3</sub>.

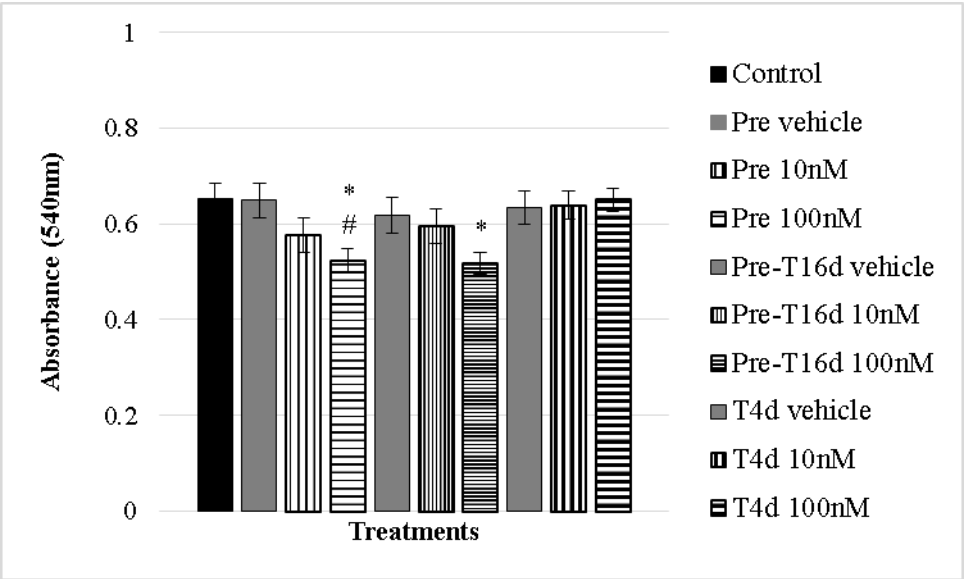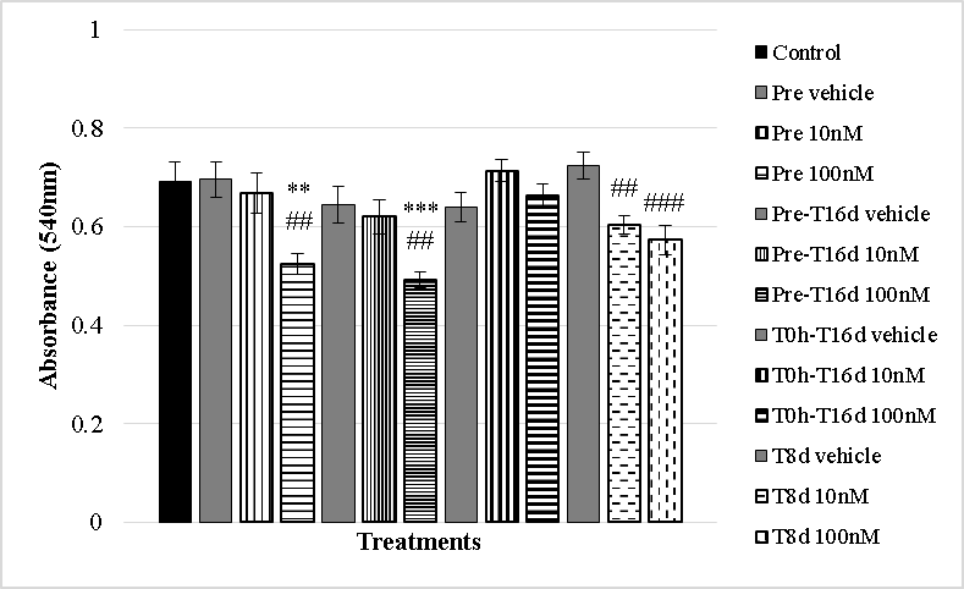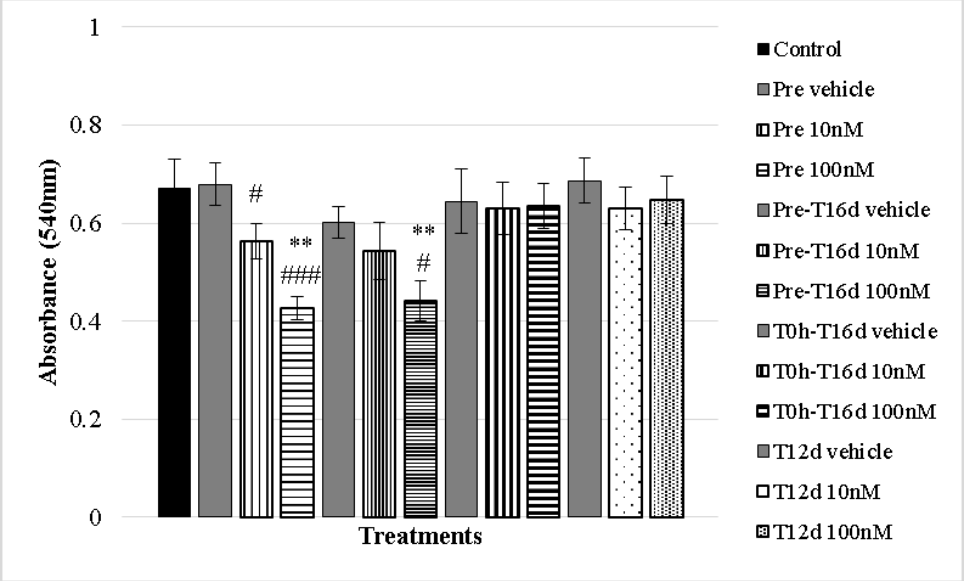

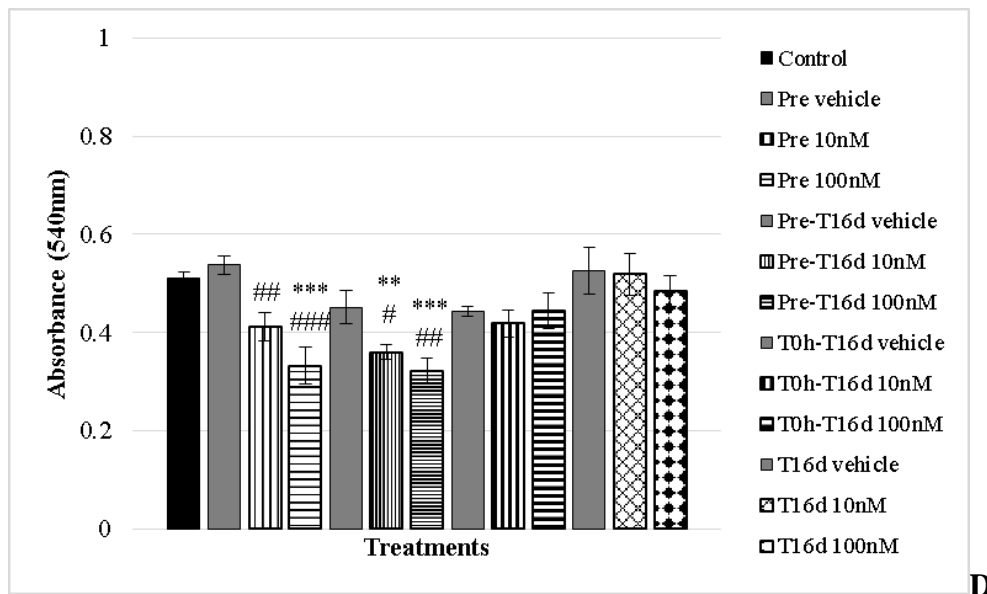

**Supplementary Figure S6 - MTT assay results of SGBS adipocytes treated with 1,25(OH)<sub>2</sub>D<sub>3</sub> (A) 4, (B) 8, (C) 12, and (D) 16 days after differentiation.** The data are presented as the mean  $\pm$  SEM. ANOVA was used to test significant differences between the treatments, and Dunnett's test was used to compare the results with those of the control (\*) and vehicle (#) treatments. \*/# $p < 0.05$ , \*\*/## $p < 0.01$ , and \*\*\*/### $p < 0.001$ . Control: untreated cells; vehicle: cells treated with ethanol; Pre: cells treated only during the preadipocyte stage; Pre-T16d: cells treated continuously from the preadipocyte stage; T0 h-T16d: cells treated continuously from the differentiation stage (T0 h); T4d: cells treated only 4 days after differentiation; T8d: cells treated after 8 days after differentiation; T12d: cells treated only 12 days after differentiation. All cells were differentiated at the same time, and differentiation proceeded equally among treatments for 16 days.

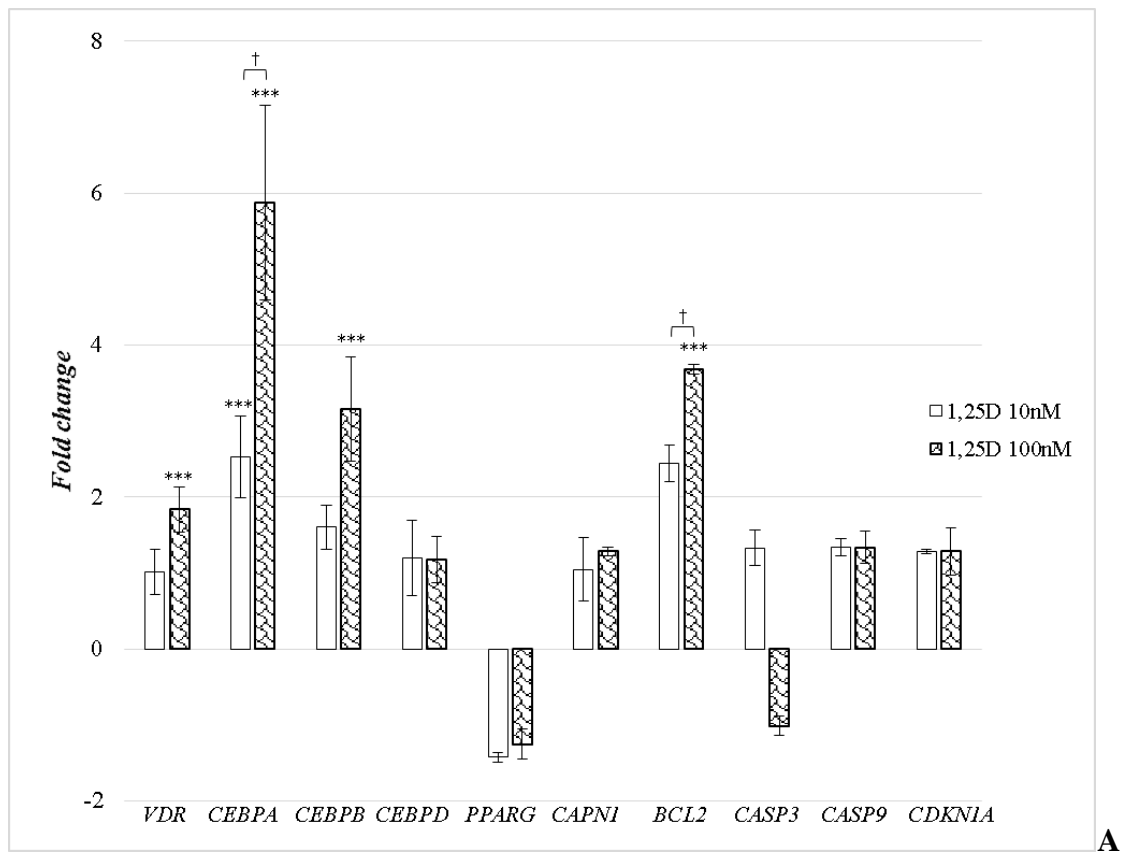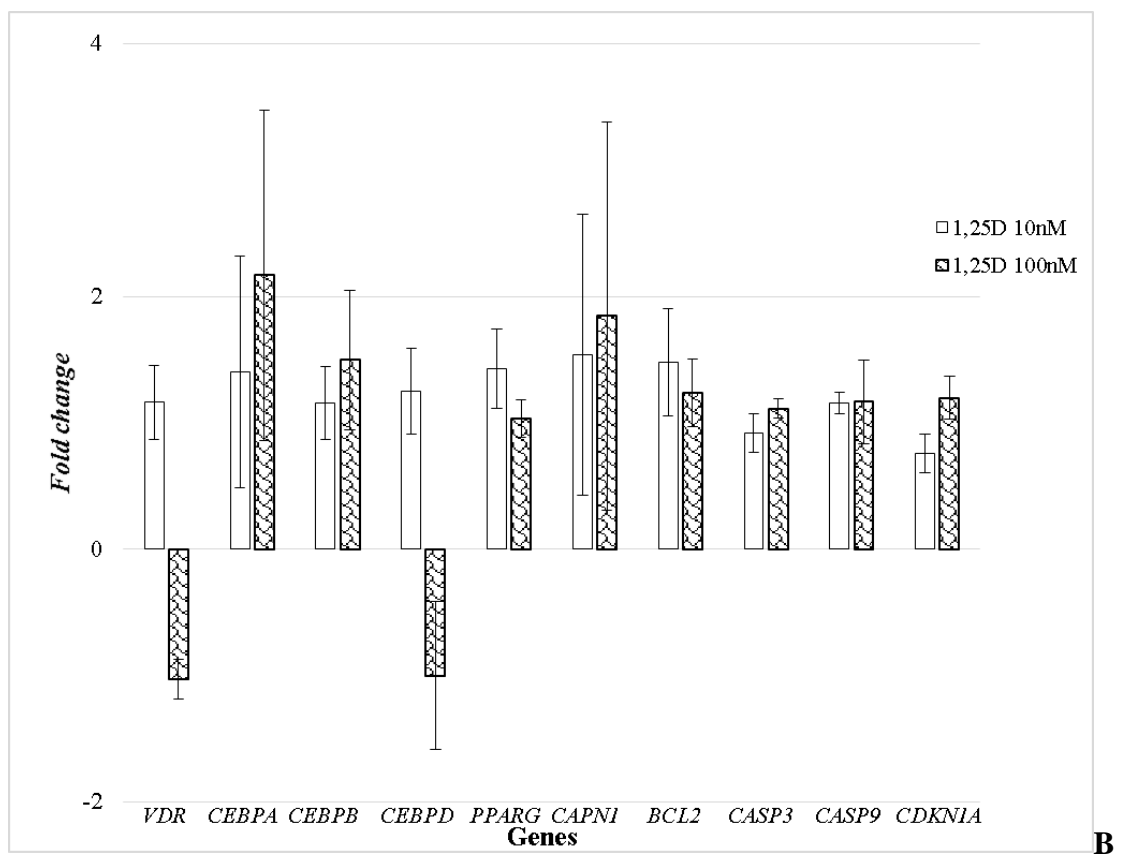

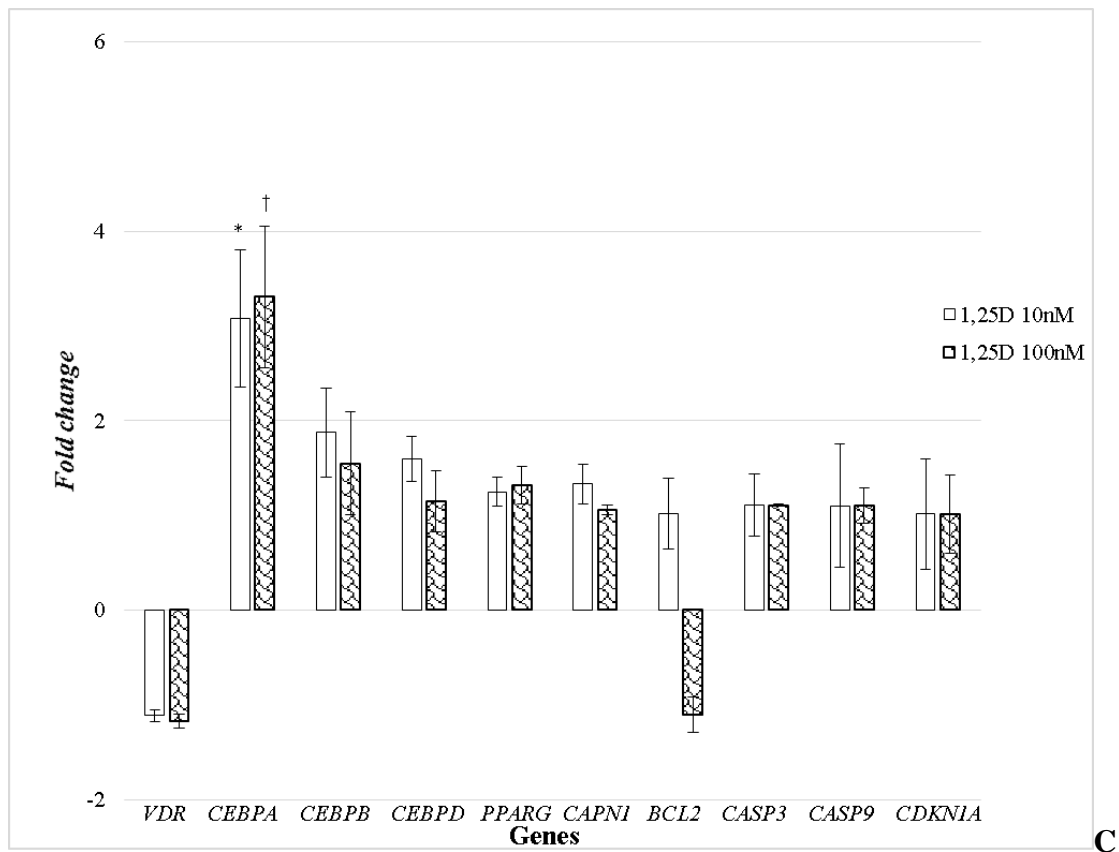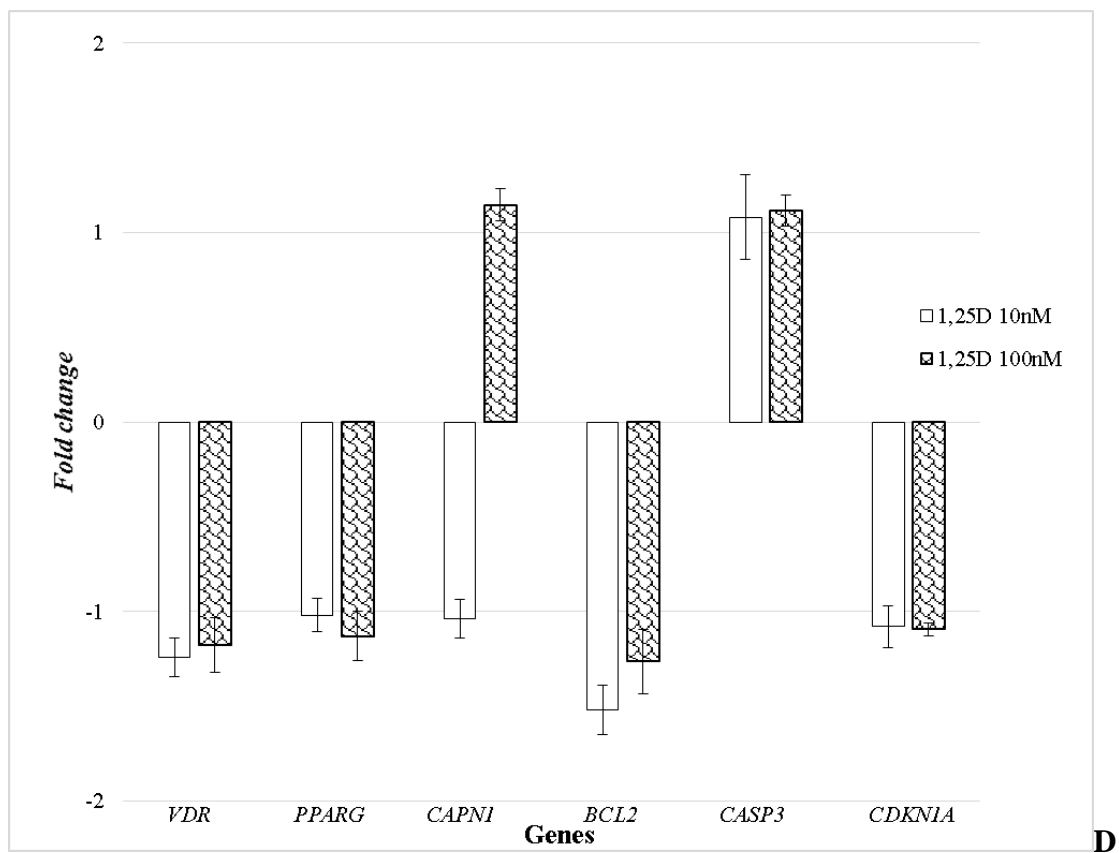

**Supplementary Figure S7 - RT-qPCR gene expression results.** Gene expression of human preadipocytes treated with 10 nM or 100 nM 1,25(OH)<sub>2</sub>D<sub>3</sub> after (A) 48 h in the preadipocyte stage and after (B) 4 h, (C) 24 h and (D) 12 days of induction of

differentiation. Columns represent the means of at least three independent experiments, and bars indicate SEM. REST software was used to calculate significant differences between normalized fold changes. Student's *t*-test was used to test significant differences between 1,25(OH)<sub>2</sub>D<sub>3</sub> concentrations. 1,25D: 1,25(OH)<sub>2</sub>D<sub>3</sub>. \**p* < 0.05, \*\*\**p* < 0.001, and †*p* ≤ 0.065.
